# Supplementary material for: Cellular membrane-targeting ruthenium complexes as efficient photosensitizers for broad-spectrum antibacterial activity
Source: Royal Society of Chemistry journal article supplement (doi:10.1039/d3dt01001e), 2023-01-01
Supplement: d3dt01001e1.pdf [file d3dt01001e1.pdf]

## Cellular membrane-targeting ruthenium complexes as an efficient photosensitizer for broad-spectrum antibacterial activity

Yi Wang,<sup>a</sup> Ya-Tao Hu,<sup>b</sup> Hai-Lin Zhang,<sup>a</sup> Yu-Yu Chen,<sup>b</sup> Hong-Dong Shi,<sup>\*c</sup> Jin-Gang Liu,<sup>\*a</sup> and Qian-Ling Zhang<sup>\*b</sup>

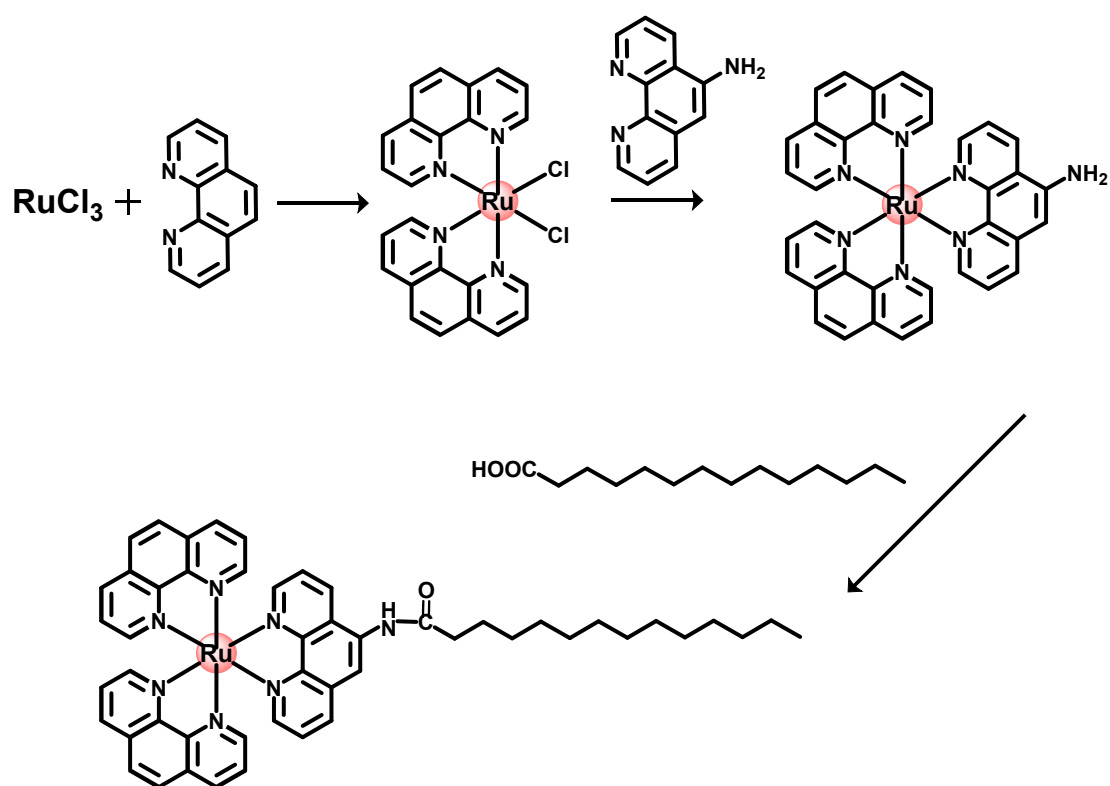

Fig. S1. The synthetic route of Ru-C14

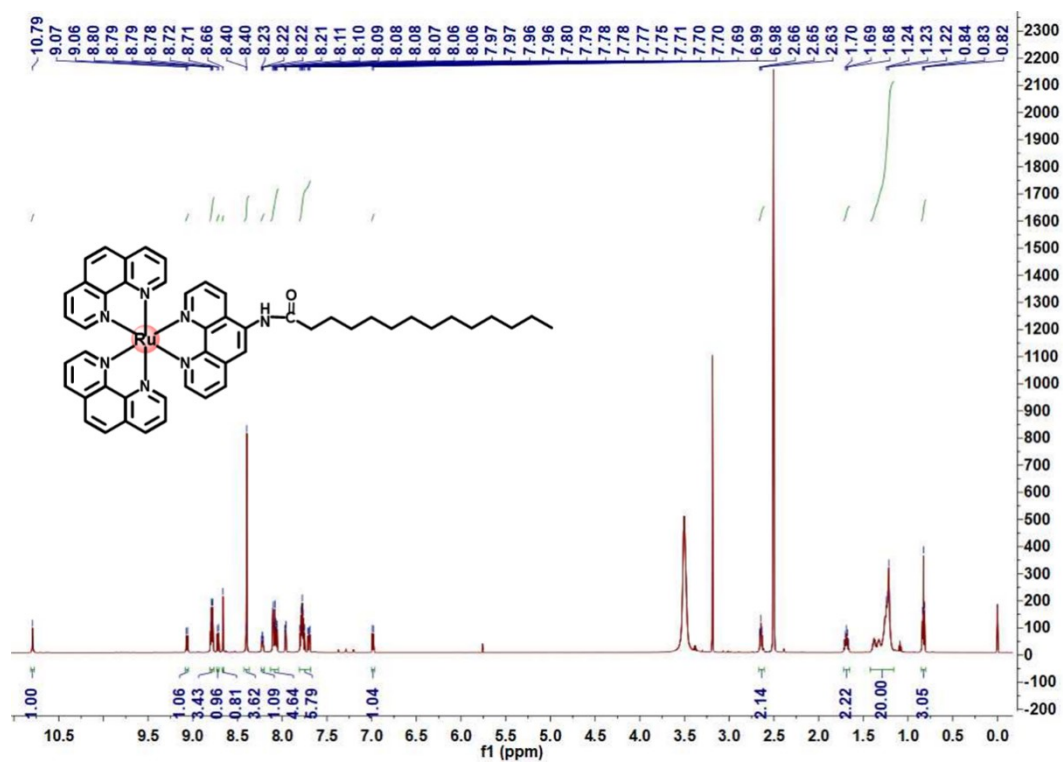

**Fig. S2.** The 500 MHz  $^1\text{H}$  NMR spectrum of Ru-C14 in the  $\text{DMSO-d}_6$  solution.

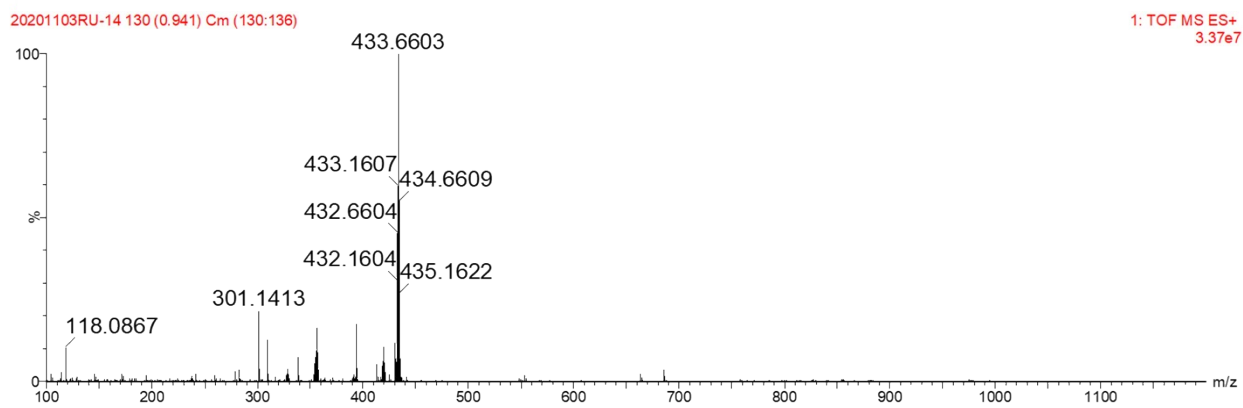

**Fig. S3.** The ESI-MS spectrum of Ru-C14 in  $\text{CH}_3\text{OH}$ .

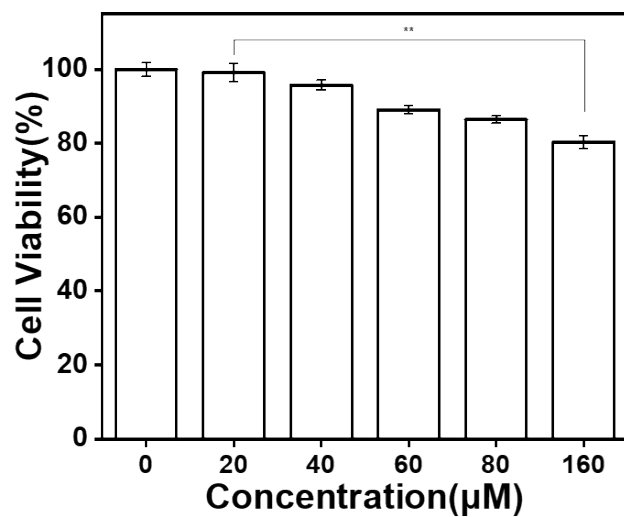

**Fig.S4** The viability of HUVEC cells after incubation with different concentrations of Ru-C14 under dark.

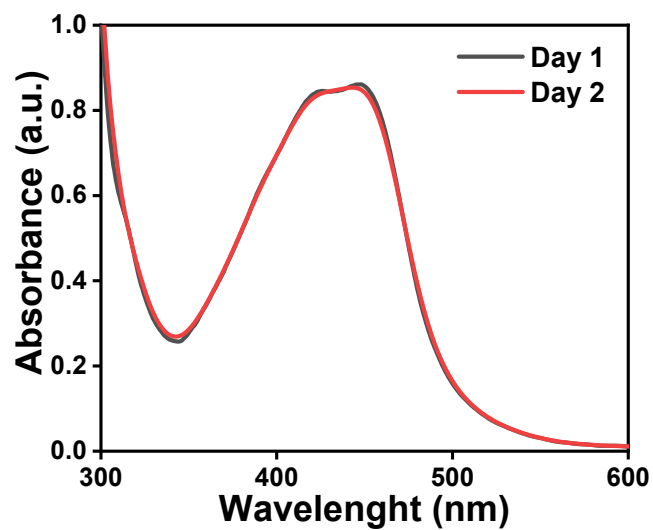

**Fig.S5** UV-vis spectra of Ru-C14 in PBS solution for 2 days.

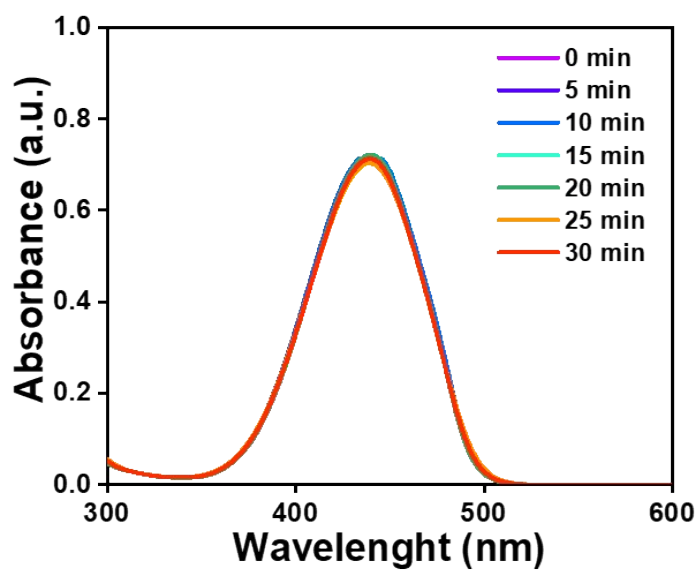

Fig.S6 Study on ROS generation of Ru-C14 under dark.

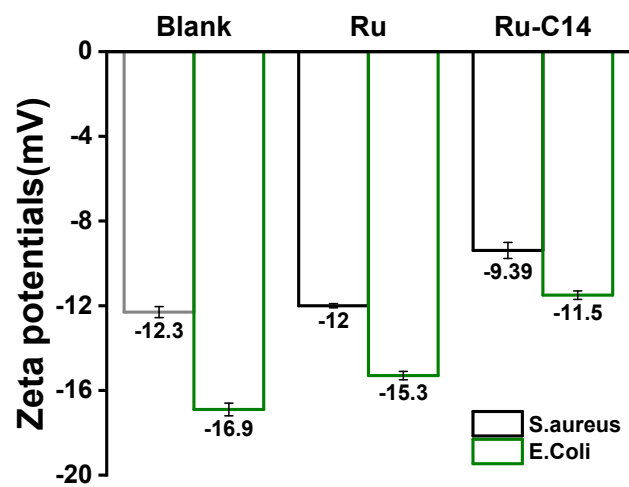

Fig.S7 Trend of zeta potential change of bacterial liquid after the treatment of different complexes.

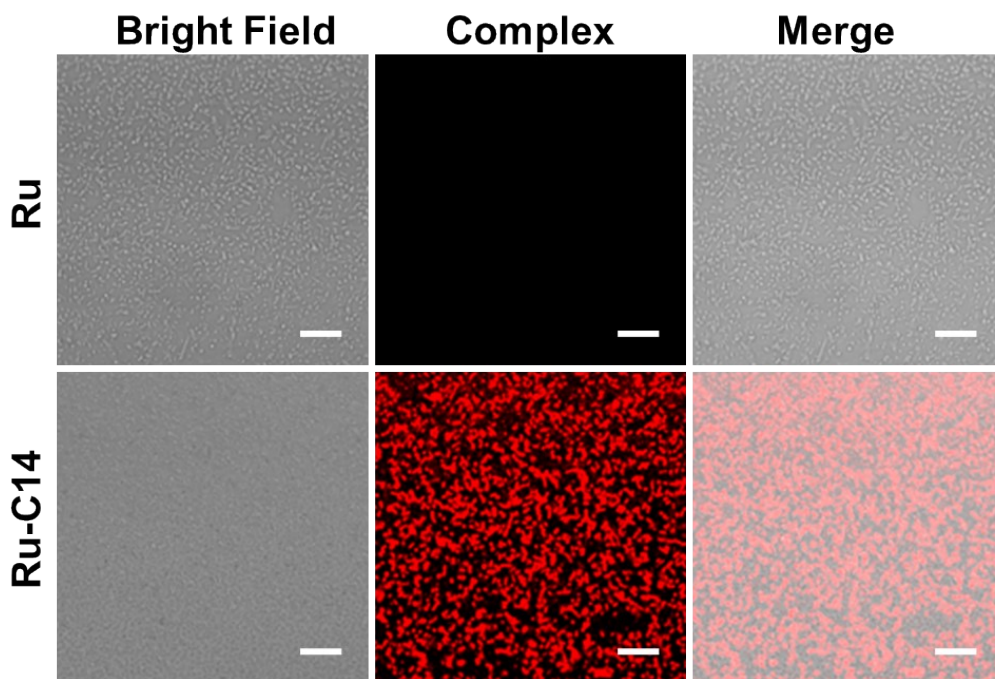

**Fig.S8** Fluorescence of *E.coli* treated with Ru and Ru-C14 at the same concentration and time. (scale bars:100  $\mu\text{m}$ )

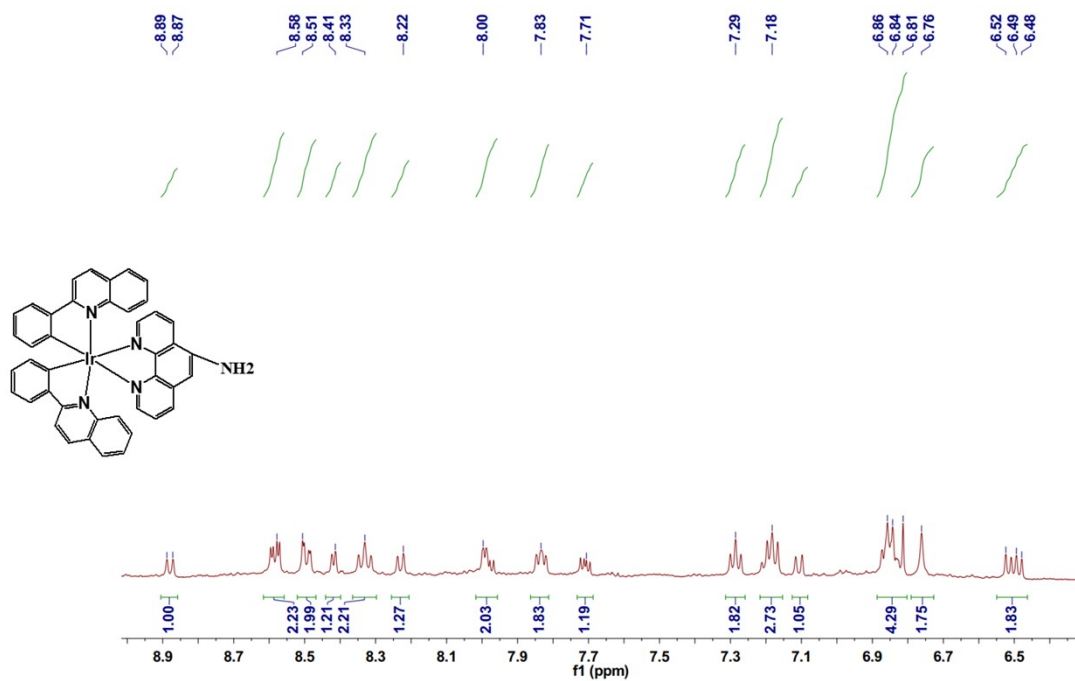

**Fig. S9.** The 500 MHz <sup>1</sup>H NMR spectrum of Ir-NH<sub>2</sub> in the DMSO-d<sub>6</sub> solution.

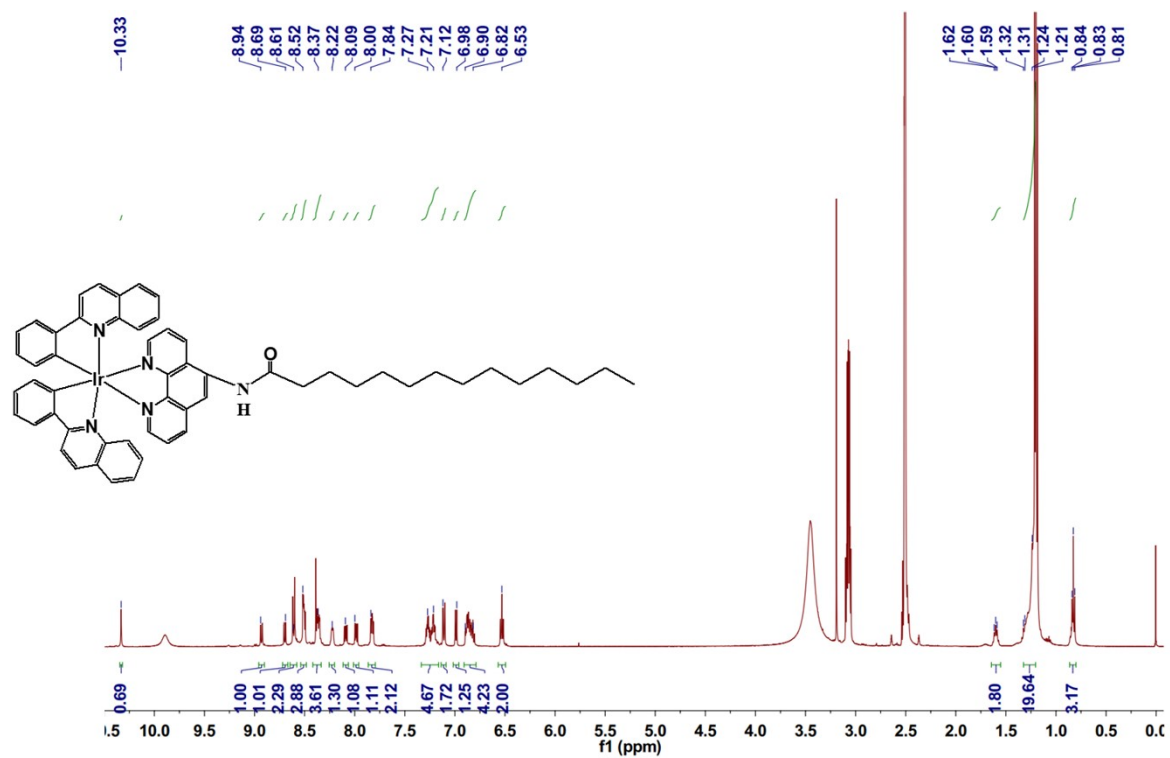

**Fig. S10.** The 500 MHz  $^1\text{H}$  NMR spectrum of Ir-NH<sub>2</sub>-C14 in the DMSO-d<sub>6</sub> solution.

**Table S1.** Antibacterial effect on two kinds of bacteria

| Samples             | Gram negative strains |              |                 |              | Gram positive strains |              |                  |              |
|---------------------|-----------------------|--------------|-----------------|--------------|-----------------------|--------------|------------------|--------------|
|                     | <i>E.coli</i>         |              |                 |              | <i>S.Aureus</i>       |              |                  |              |
|                     | Dark                  |              | Light           |              | Dark                  |              | Light            |              |
|                     | MIC/ $\mu$ M          | MBC/ $\mu$ M | MIC/ $\mu$ M    | MBC/ $\mu$ M | MIC/ $\mu$ M          | MBC/ $\mu$ M | MIC/ $\mu$ M     | MBC/ $\mu$ M |
| <b>Ru</b>           | >100                  | >100         | >100            | >100         | >100                  | >100         | >100             | >100         |
| <b>Ru-C14</b>       | 50.0 $\pm$ 0.11       | 50.0         | 12.5 $\pm$ 0.14 | 12.5         | 6.25 $\pm$ 0.23       | 6.25         | 3.125 $\pm$ 0.03 | 3.125        |
| <b>Ir</b>           | >100                  | >100         | >100            | >100         | >100                  | >100         | >100             | >100         |
| <b>Ir-C14</b>       | 50.0 $\pm$ 0.45       | 50.0         | 25 $\pm$ 0.11   | 25           | 50 $\pm$ 0.32         | 50           | 25 $\pm$ 0.72    | 25           |
| <b>Meticillin</b>   | 12.5 $\pm$ 0.54       | 12.5         | /               | /            | 6.25 $\pm$ 0.17       | 6.25         | /                | /            |
| <b>Streptomycin</b> | 25.0 $\pm$ 0.58       | 25.0         | /               | /            | 25.0 $\pm$ 0.42       | 25.0         | /                | /            |
